# Supplementary material for: An enhanced biophysical screening strategy to investigate the affinity of ASOs for their target RNA
Source: Royal Society of Chemistry journal article supplement (doi:10.1039/d3cb00072a), 2023-01-01
Supplement: d3cb00072a1.pdf [file d3cb00072a1.pdf]

Supporting information

## Enhanced biophysical screening strategy to investigate the affinity of ASOs for their target RNA.

Table S1. Table of ASO sequences used in this study and correspondent properties. Bold letters denote LNA nucleotides, italic letters denote MOE nucleotides <sup>m</sup>C denotes 5-methylcytidine, † denotes 2'-O-Methyl nucleotides. All sequences were fully phosphorothioate modified.

| ASO | Sequence                                                             | Modifications included                     | Length | Average Molecular Weight (g/mol) | Molar Extinction Coefficient (L/mol·cm) | Calc. HRMS (3-)    | Measured HRMS (3-) |
|-----|----------------------------------------------------------------------|--------------------------------------------|--------|----------------------------------|-----------------------------------------|--------------------|--------------------|
| 1   | <b>TG<sup>m</sup>CTACAAAAC<sup>m</sup>C<sup>m</sup>CA</b>            | LNA PS gapmers 3-8-3                       | 14     | 4619.76                          | 132100                                  | 1537.82<br>13      | 1537.8464          |
| 2   | <i>TG<sup>m</sup>CTACAAAAC<sup>m</sup>C<sup>m</sup>CA</i>            | MOE PS gapmers 3-8-3                       | 14     | 4896.17                          | 133200                                  | 1629.90<br>50      | 1629.9308          |
| 3   | †U†G†C†U†A†C†A†A†A†A†C†<br>C†C†A                                     | 2'OMe PS                                   | 14     | 4801.93                          | 138400                                  | 1598.52<br>14      | 1598.5465          |
| 4   | <b>TG<sup>m</sup>CT†ACAAAAC<sup>m</sup>C<sup>m</sup>CA</b>           | LNA PS gapmers 3-8-3, 2'-OMe in position 2 | 14     | 4649.79                          | 132600                                  | 1547.82<br>48      | 1547.8496          |
| 5   | <b>TG<sup>m</sup>CTA†CAAAAAC<sup>m</sup>C<sup>m</sup>CA</b>          | LNA PS gapmers 3-8-3, 2'-OMe in position 3 | 14     | 4649.79                          | 132100                                  | 1547.82<br>48      | 1547.8503          |
| 6   | <b>AUUAAUAAAAAUGC</b>                                                | LNA PS gapmers 3-8-3                       | 14     | 4633.73                          | 133800                                  | 1542.46<br>94      | 1542.4938          |
| 7   | <b>AACCCAGAAUAAAU</b>                                                | LNA PS gapmers 3-8-3                       | 14     | 4651.70                          | 131600                                  | 1548.46<br>08      | 1548.4880          |
| 8   | <b>TGATACAAAAC<sup>m</sup>C<sup>m</sup>CA</b>                        | LNA PS gapmers 3-8-3                       | 14     | 4629.76                          | 141000                                  | 1541.15<br>32      | 1541.1784          |
| 9   | <i>TGATACAAAAC<sup>m</sup>C<sup>m</sup>CA</i>                        | MOE PS gapmers 3-8-3                       | 14     | 4906.17                          | 142200                                  | 1633.23<br>69      | 1633.2643          |
| 10  | <b>TG<sup>m</sup>CTA<sup>A</sup>AAAAC<sup>m</sup>C<sup>m</sup>CA</b> | LNA PS gapmers 3-8-3                       | 14     | 4643.79                          | 136500                                  | 1545.82<br>51      | 1545.8483          |
| 11  | <i>TG<sup>m</sup>CTA<sup>A</sup>AAAAC<sup>m</sup>C<sup>m</sup>CA</i> | MOE PS gapmers 3-8-3                       | 14     | 4920.20                          | 137600                                  | 1637.90<br>88      | 1637.9323          |
| 12  | <b>GTCTGTGGAAG<sup>m</sup>CG</b>                                     | LNA PS gapmers 2-8-3                       | 13     | 4377.46                          | 123100                                  | 1457.13<br>27      | 1457.1570          |
| 13  | <b><sup>m</sup>CGTCA<sup>G</sup>TATGCGAATC</b>                       | LNA PS gapmers 3-8-3-1                     | 16     | 5304.28                          | 152200                                  | 1324.11<br>64 (4-) | 1324.1384<br>(4-)  |

### ASO1

SN1084545669\_DBuAA\_5\_50

43061\_SN1084545669\_DBuAA\_A2

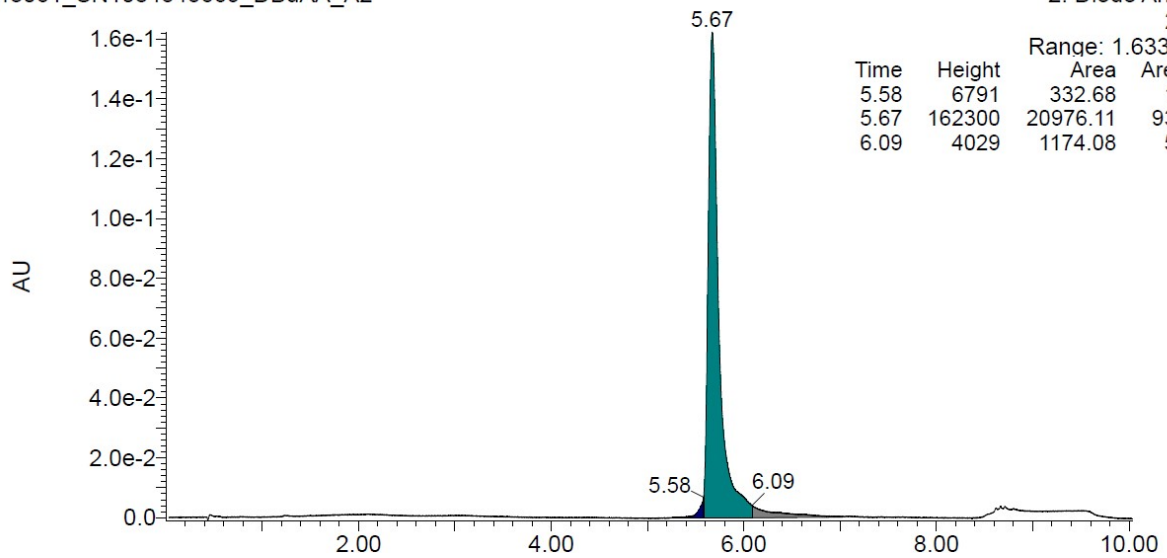

### ASO2

SN1084545669\_DBuAA\_5\_50

43061\_SN1084545669\_DBuAA\_A2

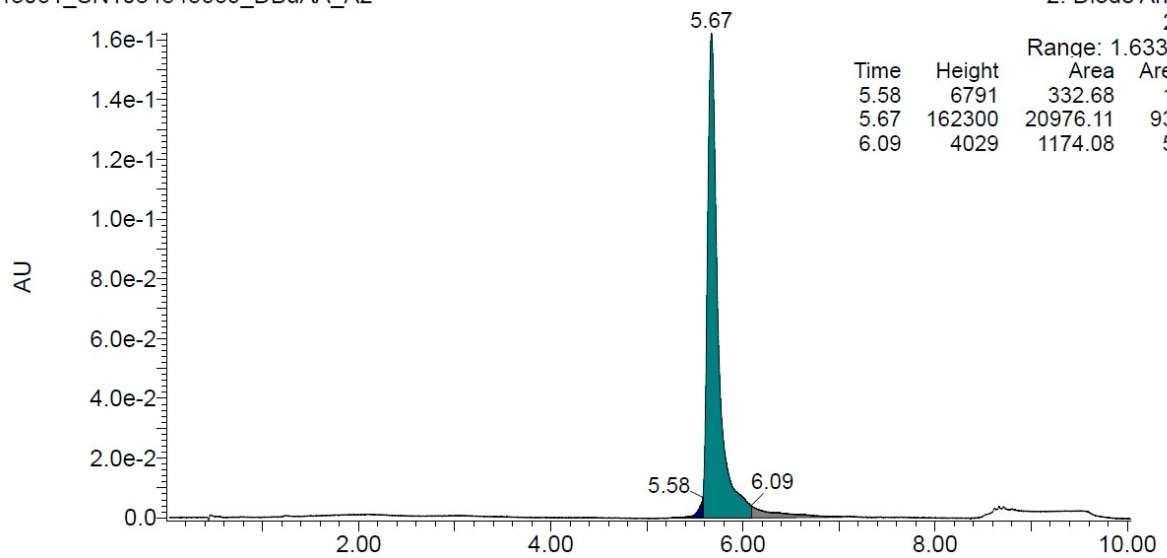

### ASO3

SN1084545773\_DBuAA\_5\_50

43062\_SN1084545773\_DBuAA\_A2

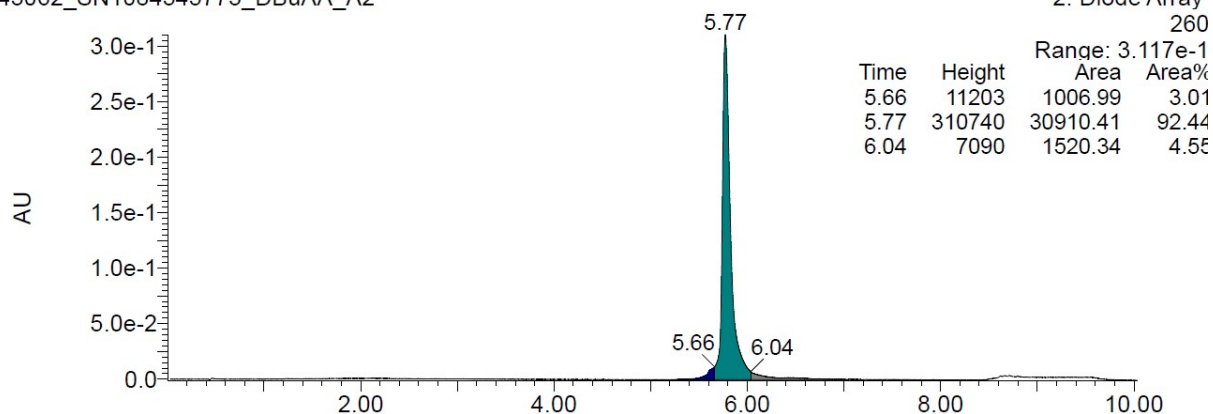

### ASO4

SN1084546160\_DBuAA\_5\_50

43070\_SN1084546160\_DBuAA\_A2

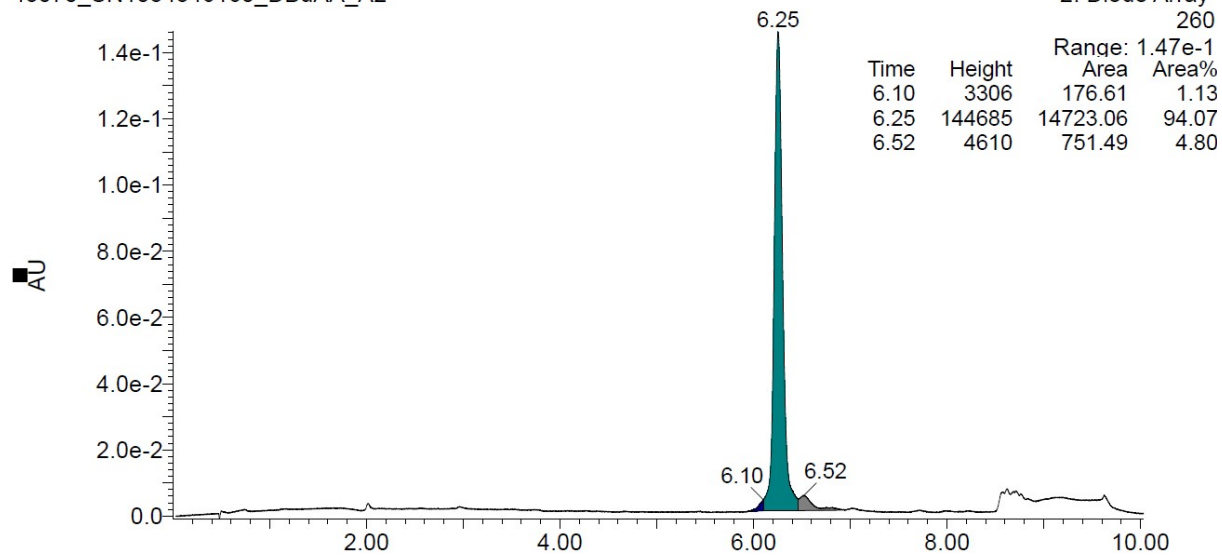

### ASO5

SN1084545787\_DBuAA\_5\_50

43063\_SN1084545787\_DBuAA\_A2

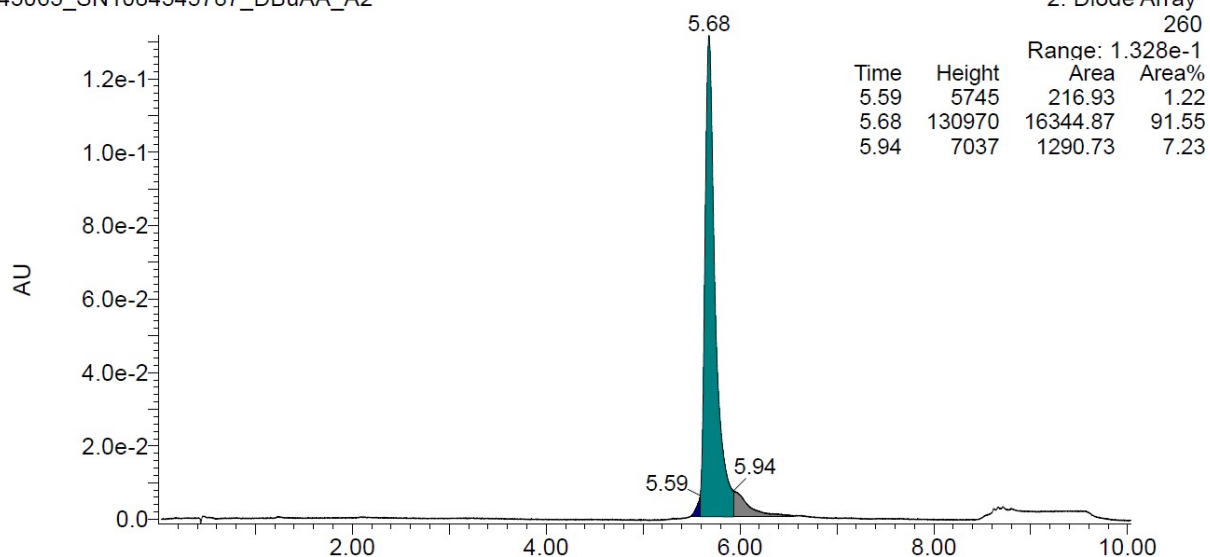

### ASO6

SN1084546174\_DBuAA\_5\_50

43071\_SN1084546174\_DBuAA\_A2

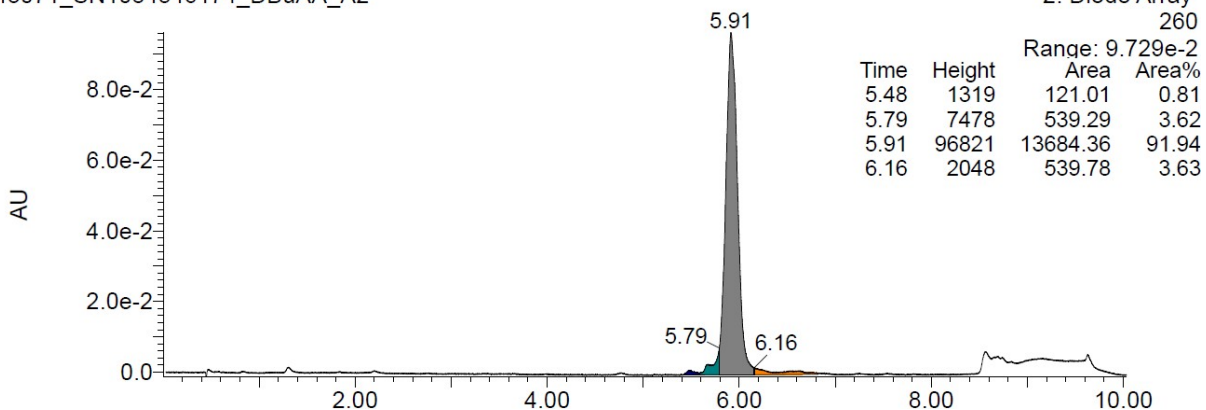

### ASO 7

SN1084545891\_DBuAA\_5\_50

43064\_SN1084545891\_DBuAA\_A2

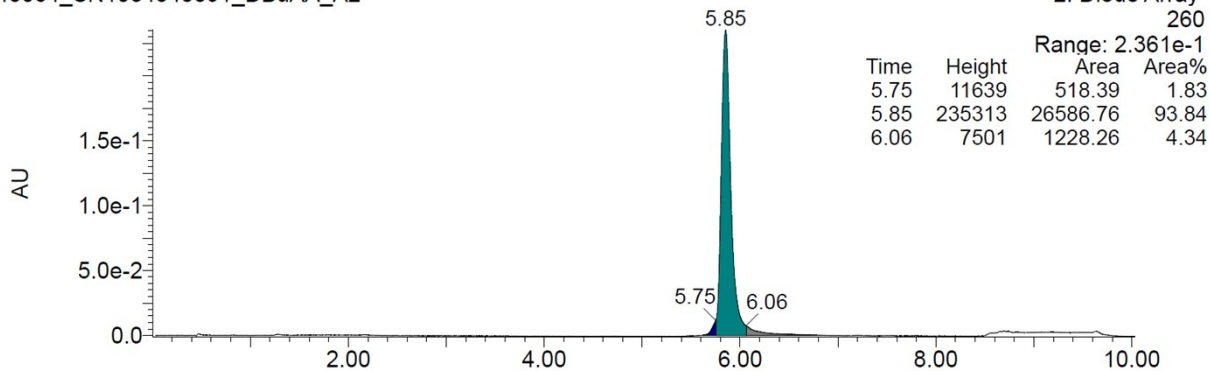

### ASO8

SN1084546188\_DBuAA\_5\_50  
43072\_SN1084546188\_DBuAA\_A2

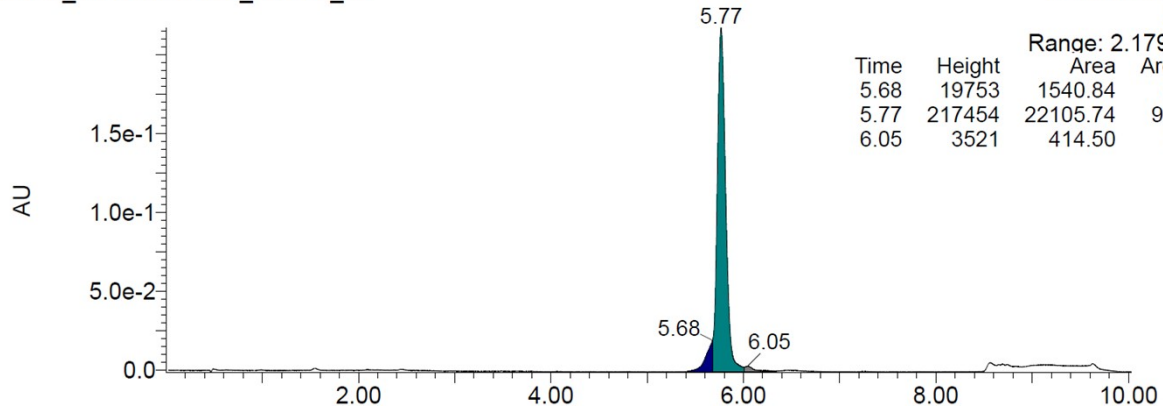

### ASO9

SN1084545806\_DBuAA\_5\_50  
43065\_SN1084545806\_DBuAA\_A2

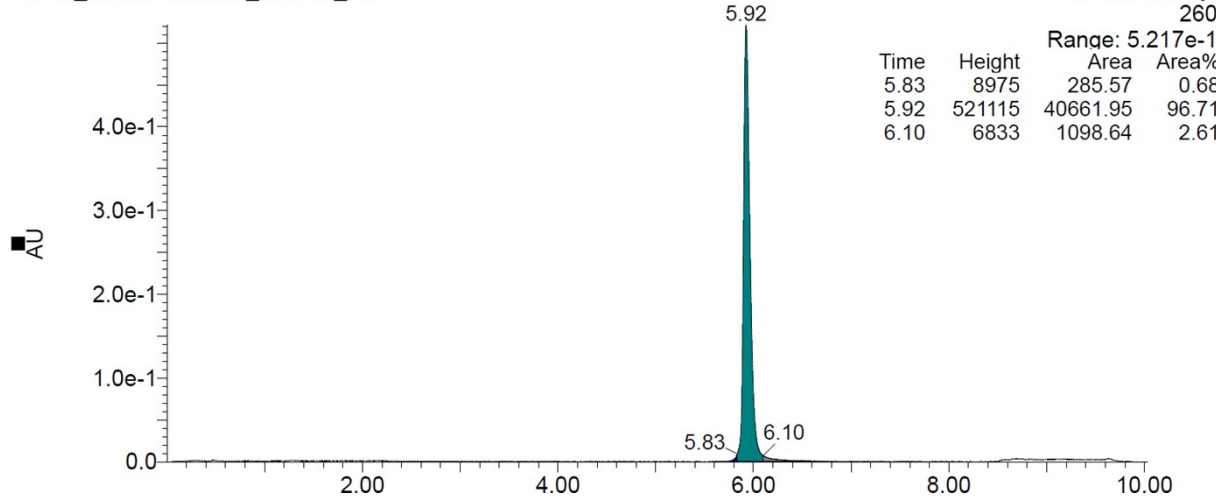

### ASO10

SN1084546292\_DBuAA\_5\_50  
43073\_SN1084546292\_DBuAA\_A2

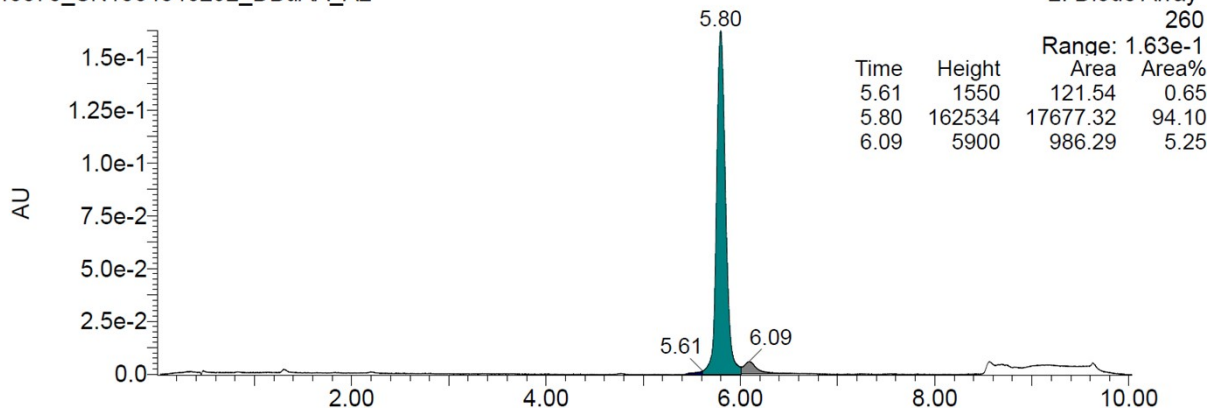

### ASO11

SN1084545910\_DBuAA\_5\_50

43066\_SN1084545910\_DBuAA\_A2

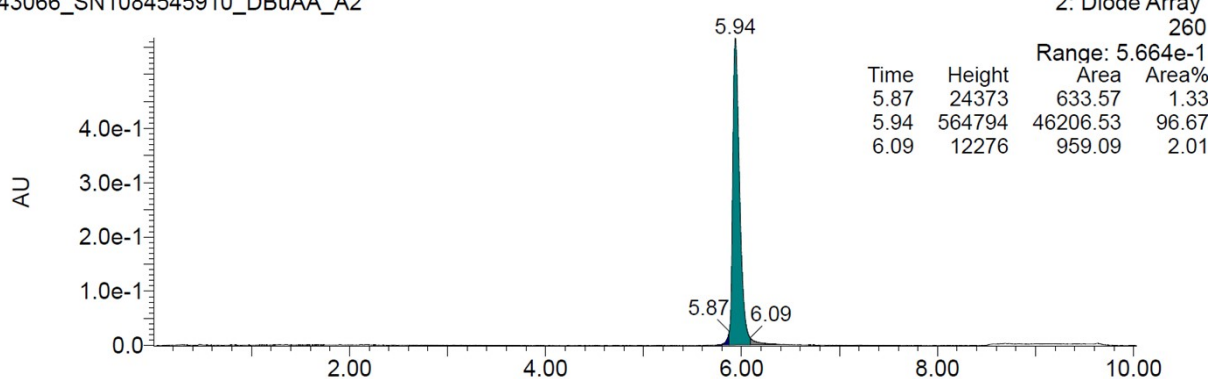

### ASO12

SN1084546207\_DBuAA\_5\_50

43074\_SN1084546207\_DBuAA\_A2

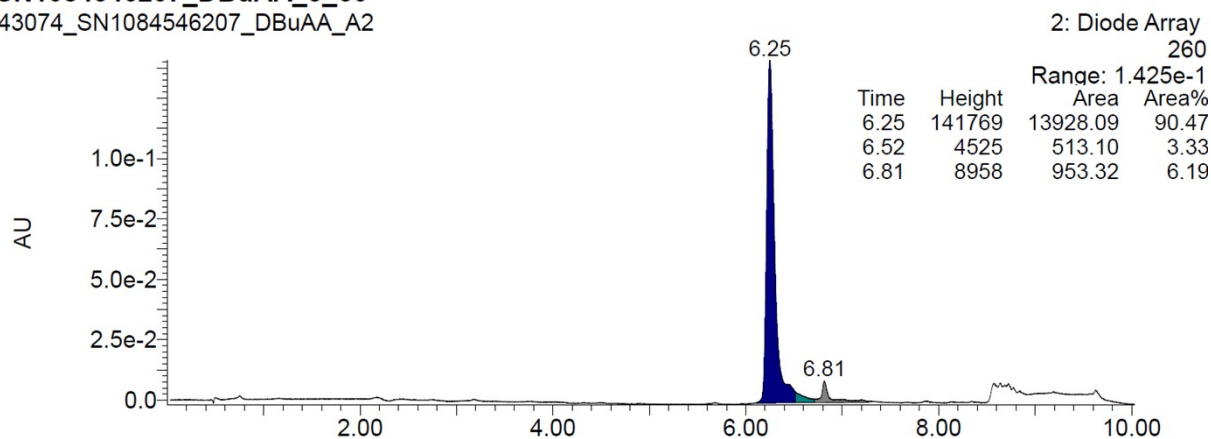

### ASO13

SN1084545924\_DBuAA\_5\_50

43067\_SN1084545924\_DBuAA\_A2

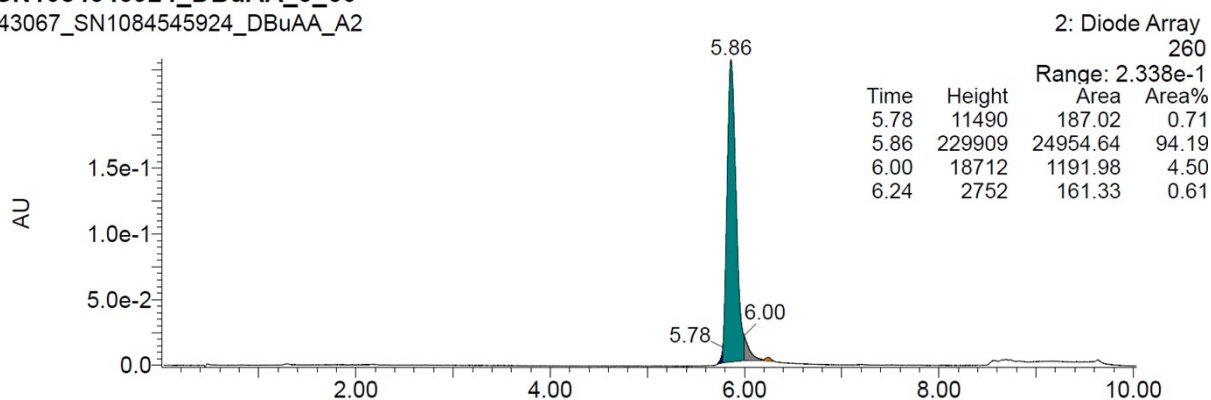

Figure S1. Oligonucleotide analytics for the sequences used in this study. Oligonucleotides were purified by preparative HPLC on aXBridge C18, 5µm 19x150mm column. A gradient from 15-50% solvent A (60mM dibutylammonium-acetate, pH 7, in acetonitrile:water=5:95) to solvent B (60mM dibutylammonium-acetate, pH 7 in acetonitrile) in 12 minutes using a flowrate of 20 mL/min. Analytical HPLC was performed on a Waters Acquity BEH C18, 1.7µm 2.1x100mm column using a gradient from 5-50% solvent A (60mM dibutylammonium-acetate, pH 7, in acetonitrile:water=5:95) to solvent B (60mM dibutylammonium-acetate, pH 7 in acetonitrile) at 60 °C and chromatograms were collected by UV detection at a wavelength of 260nm.

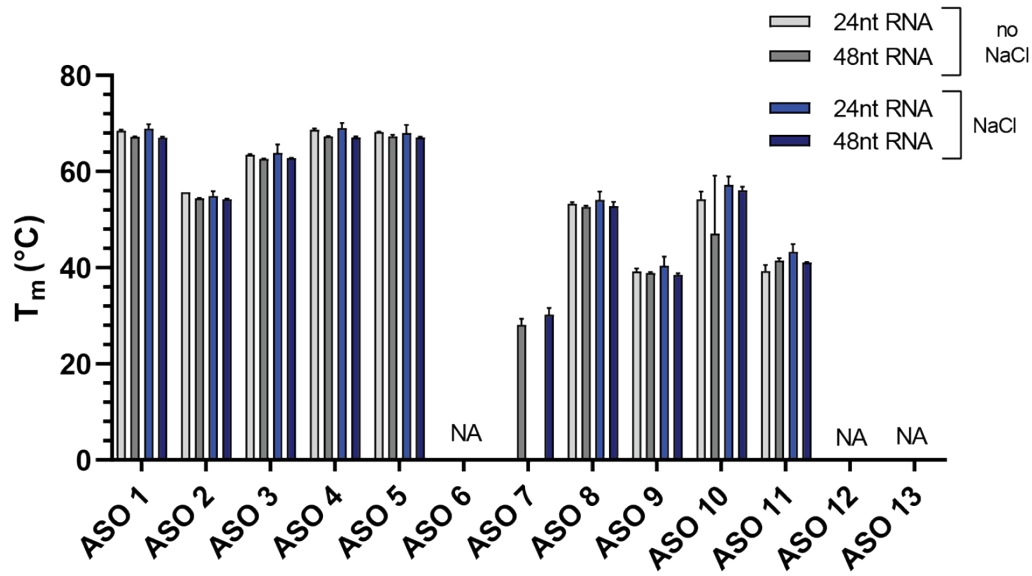

Figure S2. Differential scanning fluorimetry data for all ASOs and RNAs in two different buffer conditions, with salts and without salts.

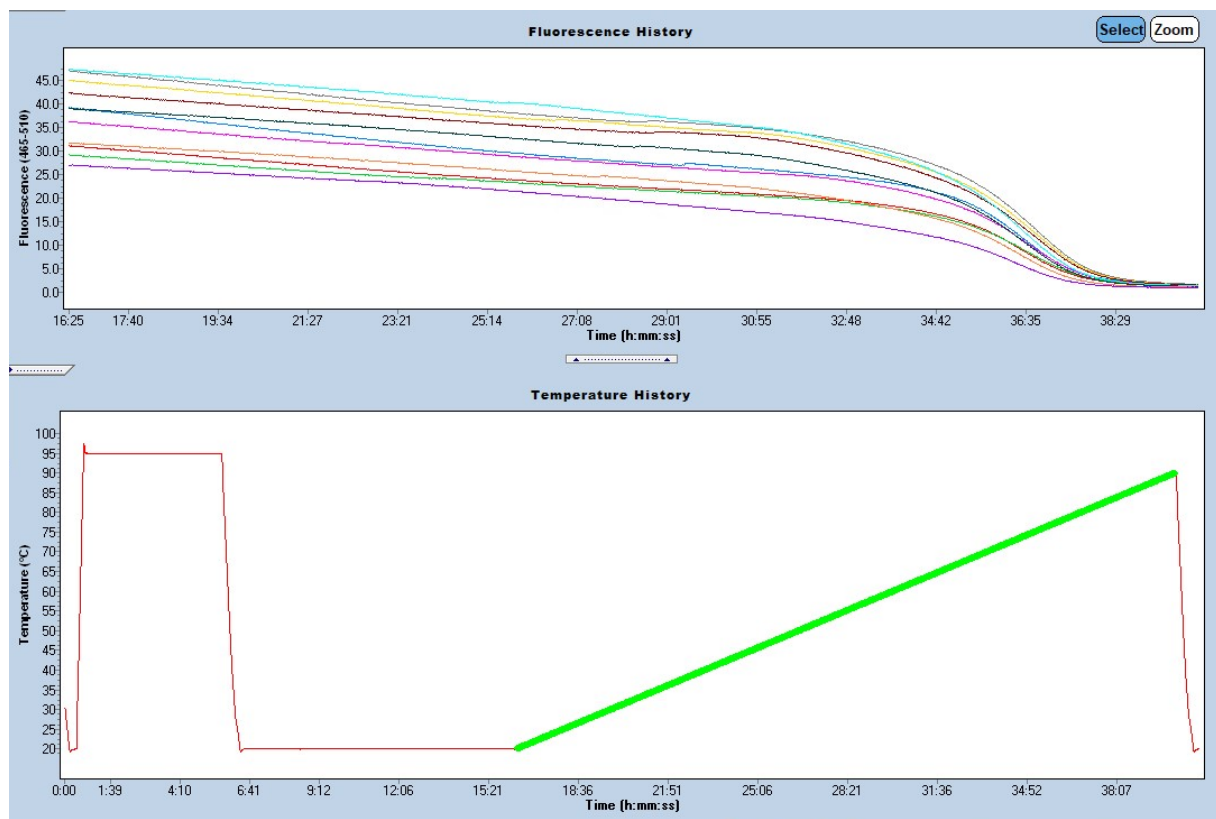

Figure S3. Fluorescence curves produced from the Roche 480 Lightcycler using RIBOGreen reporter dye. The fluorescence intensity curves for of ASOs/RNA hybridized duplexes and RNA used in this study where measures at 4  $\mu$ M in 10  $\mu$ l total volume and 50 nl of Quant-iT<sup>TM</sup> RiboGreen<sup>®</sup> (RIBO, Life Technologies, Ex max= $\sim$ 500 nm, Em max= $\sim$ 525 nm) dye stock solution in DMSO. The fluorescence intensity was monitored using the SYBR Green I/HRM dye filter combination (465–510 nm) from 20 to 95  $^{\circ}$ C at a ramp rate of 0.03  $^{\circ}$ C/s with 36 acquisitions per  $^{\circ}$ C.



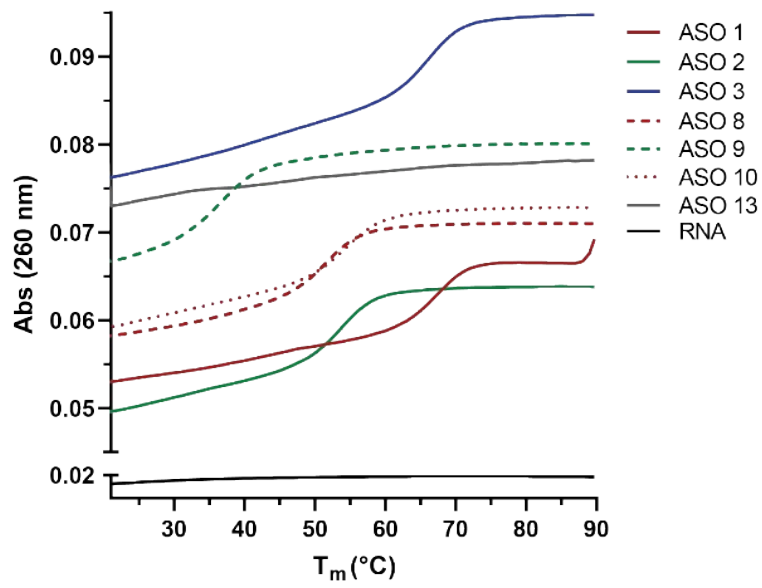

Figure S4. Raw denaturation melting temperature curves measured by absorbance at 260nm through UV spectroscopy.



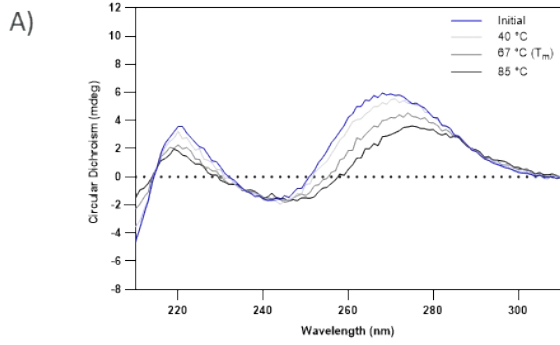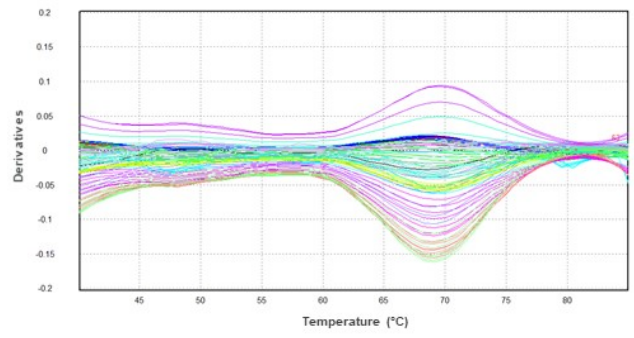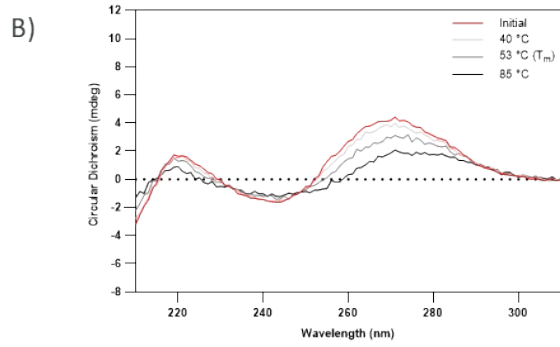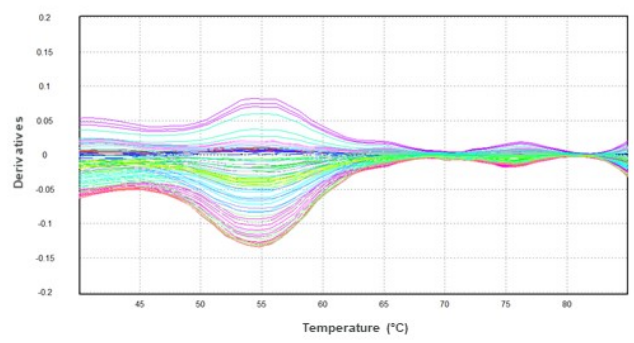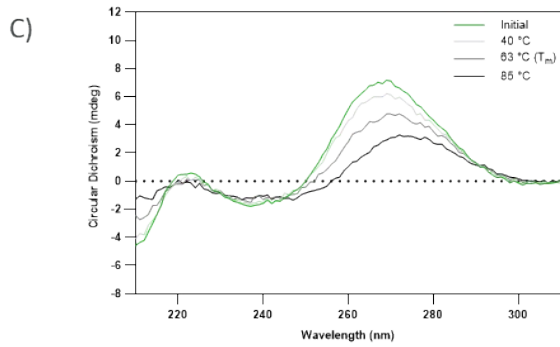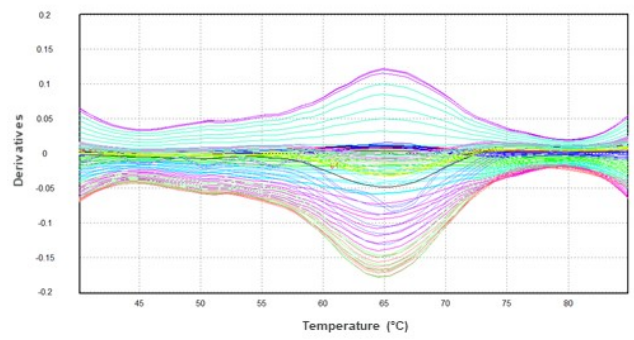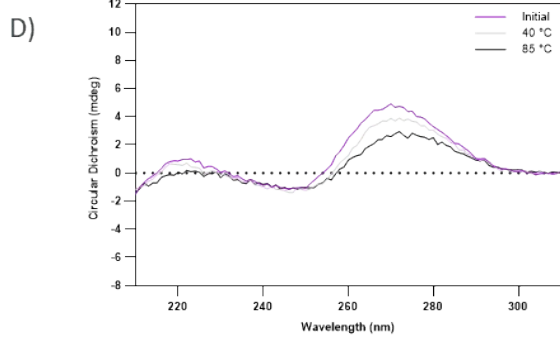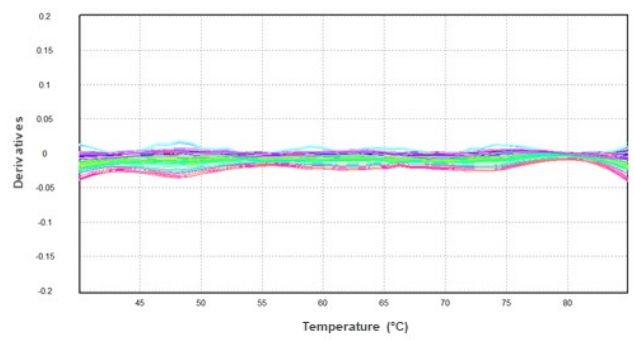

E)

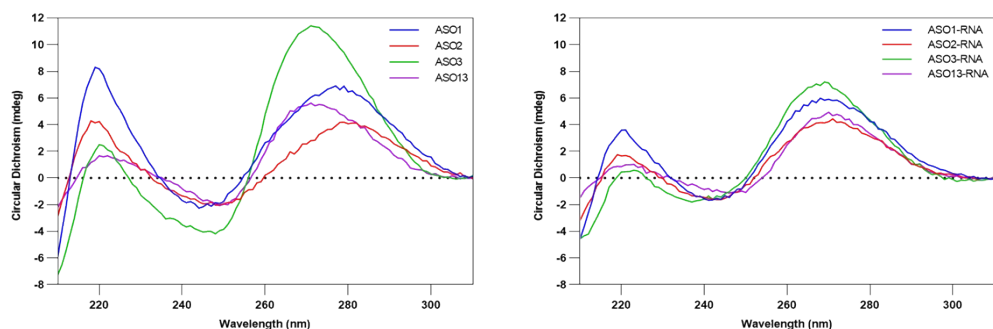

F)

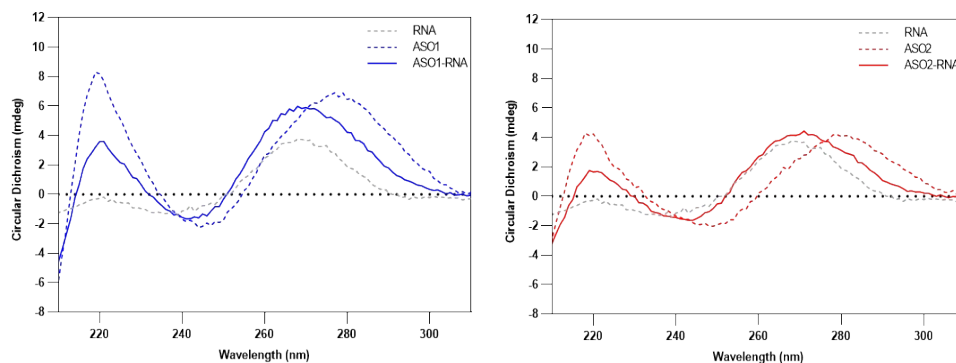

G)

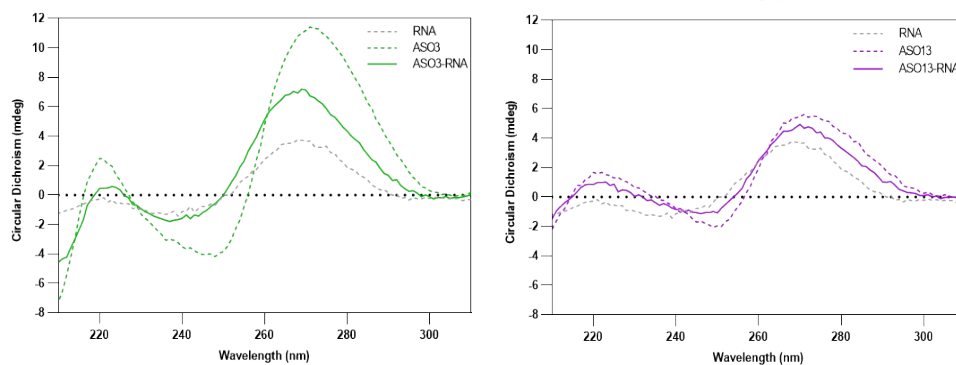

Figure S5. Circular Dichroism Spectroscopy. The CD spectra at 20°C (initial), 40°C, melting temperature ( $T_m$ ) and 85 °C (left) and the derivative plots including all wavelengths (right) for A) ASO 1/RNA B) ASO 2/RNA C) ASO 3-RNA D) ASO 13/RNA. The CD derivative plots for E) ASO 1-RNA F) ASO 2-RNA G) ASO 3-RNA D) ASO 13-RNA at 85°C

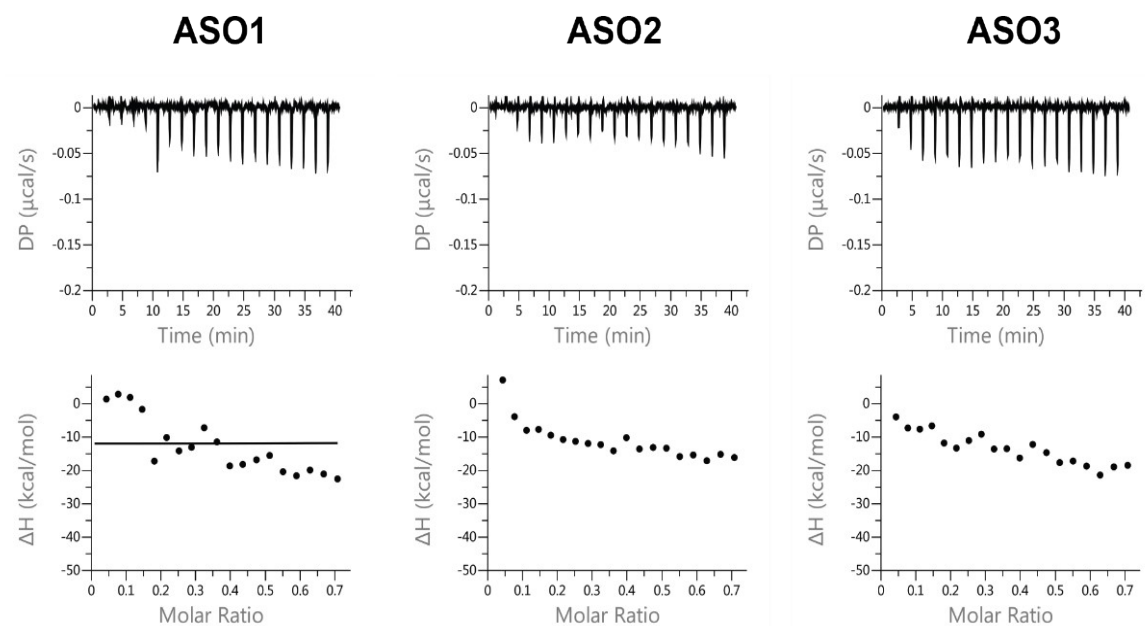

Figure S6. Isothermal calorimetry. Controls binding isotherms for ASO 1, 2 and 3 AT 37°C.

Table S2. SPR kinetics values measured at 25°C through a 1:1 binding model

| ASO | AZ Sequence       | Sugar Composition | Sugar Pattern | ka (1/Ms) | kd (1/s) | KD (M)   | St dev KD |
|-----|-------------------|-------------------|---------------|-----------|----------|----------|-----------|
| 1   | TGmCTACAAAACmCmCA | LNA-DNA-LNA       | 3-8-3         | 5.99E+06  | 2.59E-03 | 4.28E-10 | 1.71E-10  |
| 2   | TGmCTACAAAACmCmCA | MOE-DNA-MOE       | 3-8-3         | 2.33E+05  | 5.38E-05 | 2.34E-10 | 9.06E-11  |
| 3   | UGCUACAAAACCCA    | OMe               | 14            | 3.02E+05  | 2.81E-05 | 7.81E-11 | 7.46E-11  |
| 8   | TGATACAAAACmCmCA  | LNA-DNA-LNA       | 3-8-3         | 4.77E+05  | 2.75E-04 | 3.87E-10 | 9.06E-11  |
| 9   | TGATACAAAACmCmCA  | MOE-DNA-MOE       | 3-8-3         | 4.61E+08  | 1.32E+01 | 2.83E-08 | 3.97E-10  |
| 10  | TGmCTAAAAAACmCmCA | LNA-DNA-LNA       | 3-8-3         | 3.52E+08  | 9.73E+00 | 1.81E-08 | 7.79E-11  |
| 11  | TGmCTAAAAAACmCmCA | MOE-DNA-MOE       | 3-8-3         | 9.95E+05  | 7.79E-03 | 7.92E-09 | 1.12E-09  |
| 13  | mCGTCAGTATGCGAATC | LNA-DNA-LNA       | 3-8-3         | NA        | NA       | NA       | NA        |

Table S3. . SPR kinetics values measured at 37°C through a 1:1 binding model.

| ASO | AZ Sequence       | Sugar Composition | Sugar Pattern | ka (1/Ms) | kd (1/s) | KD (M)   | St dev KD |
|-----|-------------------|-------------------|---------------|-----------|----------|----------|-----------|
| 1   | TGmCTACAAAACmCmCA | LNA-DNA-LNA       | 3-8-3         | 1.50E+06  | 2.15E-04 | 1.41E-10 | 3.11E-11  |
| 2   | TGmCTACAAAACmCmCA | MOE-DNA-MOE       | 3-8-3         | 1.11E+06  | 1.32E-03 | 2.79E-09 | 2.31E-09  |
| 3   | UGCUACAAAACCCA    | OMe               | 14            | 6.73E+05  | 1.11E-03 | 1.88E-09 | 2.15E-09  |
| 8   | TGATACAAAACmCmCA  | LNA-DNA-LNA       | 3-8-3         | 8.86E+05  | 4.23E-03 | 5.50E-09 | 2.31E-09  |
| 9   | TGATACAAAACmCmCA  | MOE-DNA-MOE       | 3-8-3         | NA        | NA       | NA       | NA        |
| 10  | TGmCTAAAAAACmCmCA | LNA-DNA-LNA       | 3-8-3         | 5.80E+05  | 5.31E-03 | 1.89E-08 | 2.47E-08  |
| 11  | TGmCTAAAAAACmCmCA | MOE-DNA-MOE       | 3-8-3         | NA        | NA       | NA       | NA        |
| 13  | mCGTCAGTATGCGAATC | LNA-DNA-LNA       | 3-8-3         | NA        | NA       | NA       | NA        |

Table S4. ITC values measured at 37°C and 45°C for ASO 1, 2, 3 and 24nt RNA duplexes.

| Samples         | T(°C) | N (sites) | KD (M)   | $\Delta H$ (kcal/mol) | $\Delta G$ (kcal/mol) | $-T\Delta S$ (kcal/mol) | Offset (kcal/mol) | Red. Chi-Sqr. (kcal/mol) <sup>2</sup> |
|-----------------|-------|-----------|----------|-----------------------|-----------------------|-------------------------|-------------------|---------------------------------------|
| 24nt RNA + ASO1 | 37    | 0.927     | 8.09E-09 | -35.8                 | -11.6                 | 24.2                    | -5.6              | 7.2                                   |
| 24nt RNA + ASO2 | 37    | 0.972     | 3.91E-09 | -21.9                 | -11.9                 | 9.9                     | -7.0              | 1.4                                   |
| 24nt RNA + ASO3 | 37    | 1.1       | 3.32E-09 | -24.5                 | -12.4                 | 12.1                    | -13.4             | 3.5                                   |
| 24nt RNA + ASO1 | 45    | 0.927     | 1.22E-08 | -46.0                 | -11.5                 | 34.5                    | -2.1              | 18.0                                  |
| 24nt RNA + ASO2 | 45    | 1         | 4.87E-08 | -38.3                 | -10.6                 | 27.6                    | 0.1               | 5.2                                   |
| 24nt RNA + ASO3 | 45    | 1.02      | 8.52E-09 | -43.8                 | -11.7                 | 32.0                    | -1.8              | 3.7                                   |

Table S5. Invariant parameters of ASO 2 in the presence and absence of RNA

| Sample        | Maximum Dimension (Å) | Radius of gyration (Å) | Molecular weight estimate (Da) |
|---------------|-----------------------|------------------------|--------------------------------|
| ASO           | 43                    | 14.2                   | 4050-5450                      |
| ASO + 24ntRNA | 63                    | 20.5                   | 9950-11650                     |

Table S6. Replicates SPR assay at 25°C.

| Sample | ka (1/Ms) | kd (1/s) | KD (M)   | Rmax (RU) | Chi <sup>2</sup> (RU <sup>2</sup> ) | Model       |
|--------|-----------|----------|----------|-----------|-------------------------------------|-------------|
| ASO 1  | 5.00E+06  | 1.74E-03 | 3.48E-10 | 65.8      | 1.57                                | 1:1 w Drift |
|        | 6.64E+06  | 2.07E-03 | 3.12E-10 | 54.7      | 1.7                                 | 1:1 w Drift |
|        | 6.33E+06  | 3.96E-03 | 6.25E-10 | 75.6      | 1.8                                 | 1:1 w Drift |
| ASO 2  | 2.30E+05  | 4.20E-05 | 1.83E-10 | 110.2     | 0.526                               | 1:1 w Drift |
|        | 2.52E+05  | 4.56E-05 | 1.81E-10 | 93        | 1.03                                | 1:1 w Drift |
|        | 2.18E+05  | 7.37E-05 | 3.39E-10 | 116.4     | 1.21                                | 1:1 w Drift |
| ASO 3  | 2.98E+05  | 2.53E-05 | 8.49E-11 | 136.4     | 0.848                               | 1:1 w Drift |
|        | 3.94E+05  | 5.88E-05 | 1.49E-10 | 108.6     | 1.23                                | 1:1 w Drift |
|        | 2.14E+05  | 5.84E-08 | 2.73E-13 | 168.1     | 1.41                                | 1:1 w Drift |
| ASO 8  | 2.74E+05  | 5.02E-05 | 1.83E-10 | 141.1     | 2.24                                | 1:1 w Drift |
|        | 2.86E+05  | 3.85E-05 | 1.34E-10 | 123.5     | 2.31                                | 1:1 w Drift |
|        | 8.71E+05  | 7.35E-04 | 8.44E-10 | 102.4     | 2.22                                | 1:1 w Drift |
| ASO 9  | 8.78E+08  | 2.47E+01 | 2.81E-08 | 89.3      | 1.05                                | 1:1 w Drift |
|        | 1.76E+08  | 4.49E+00 | 2.55E-08 | 77.9      | 1.43                                | 1:1 w Drift |
|        | 3.30E+08  | 1.03E+01 | 3.12E-08 | 94.1      | 1.53                                | 1:1 w Drift |
| ASO 10 | 1.31E+06  | 2.62E-04 | 2.00E-10 | 122.3     | 2.6                                 | 1:1 w Drift |
|        | 1.38E+06  | 2.31E-04 | 1.68E-10 | 108       | 2.52                                | 1:1 w Drift |
|        | 3.04E+06  | 9.63E-04 | 3.16E-10 | 129.9     | 3.39                                | 1:1 w Drift |
| ASO 11 | 1.01E+06  | 7.85E-03 | 7.75E-09 | 80.1      | 0.548                               | 1:1 w Drift |
|        | 1.11E+06  | 7.64E-03 | 6.89E-09 | 69.3      | 0.983                               | 1:1 w Drift |
|        | 8.66E+05  | 7.89E-03 | 9.11E-09 | 82.2      | 1.11                                | 1:1 w Drift |
| ASO 13 | 2.37E+10  | 2.22E+03 | 9.36E-08 | 7.2       | 0.0688                              | 1:1 w Drift |
|        | 4.23E+07  | 5.06E+00 | 1.20E-07 | 8.6       | 0.596                               | 1:1 w Drift |
|        | 4.67E+07  | 2.42E+00 | 5.18E-08 | 5.4       | 0.579                               | 1:1 w Drift |

Table S7. Replicates SPR assay at 37°C.

| Sample | ka (1/Ms) | kd (1/s) | KD (M)   | Rmax (RU) | Chi <sup>2</sup> (RU <sup>2</sup> ) | Model       |
|--------|-----------|----------|----------|-----------|-------------------------------------|-------------|
| ASO 1  | 1.34E+06  | 1.60E-04 | 1.19E-10 | 187.7     | 2.31                                | 1:1 w drift |
|        | 1.65E+06  | 2.69E-04 | 1.63E-10 | 189       | 4.16                                | 1:1 w drift |
|        | 2.43E+06  | 3.25E-04 | 1.34E-10 | 164.4     | 2.93                                | 1:1 w drift |
| ASO 2  | 4.34E+05  | 1.68E-03 | 3.88E-09 | 74.6      | 0.283                               | 1:1 w drift |
|        | 4.51E+05  | 1.96E-03 | 4.35E-09 | 72.7      | 0.923                               | 1:1 w drift |
|        | 5.47E+05  | 2.38E-03 | 4.36E-09 | 52.2      | 0.782                               | 1:1 w drift |
| ASO 3  | 6.45E+05  | 3.53E-04 | 5.48E-10 | 109.8     | 0.762                               | 1:1 w drift |
|        | 8.28E+05  | 6.03E-04 | 7.28E-10 | 102.7     | 1.59                                | 1:1 w drift |
|        | 1.16E+06  | 8.02E-04 | 6.93E-10 | 80.1      | 1.25                                | 1:1 w drift |
| ASO 8  | 7.02E+05  | 5.37E-03 | 7.65E-09 | 74        | 0.369                               | 1:1 w drift |
|        | 7.97E+05  | 6.51E-03 | 8.16E-09 | 75        | 1.02                                | 1:1 w drift |
|        | 8.91E+05  | 7.29E-03 | 8.18E-09 | 56.6      | 0.803                               | 1:1 w drift |
| ASO 9  | NA        | NA       | NA       | NA        | NA                                  | 1:1 w drift |
|        | NA        | NA       | NA       | NA        | NA                                  | 1:1 w drift |
|        | NA        | NA       | NA       | NA        | NA                                  | 1:1 w drift |
| ASO 10 | 2.16E+06  | 5.27E-03 | 2.44E-09 | 95.4      | 0.604                               | 1:1 w drift |
|        | 2.23E+06  | 5.71E-03 | 2.57E-09 | 96.3      | 1.05                                | 1:1 w drift |
|        | 2.53E+06  | 6.29E-03 | 2.48E-09 | 83.5      | 0.779                               | 1:1 w drift |
| ASO 11 | NA        | NA       | NA       | NA        | NA                                  | 1:1 w drift |
|        | NA        | NA       | NA       | NA        | NA                                  | 1:1 w drift |
|        | NA        | NA       | NA       | NA        | NA                                  | 1:1 w drift |
| ASO 13 | NA        | NA       | NA       | NA        | NA                                  | 1:1 w drift |
|        | NA        | NA       | NA       | NA        | NA                                  | 1:1 w drift |
|        | NA        | NA       | NA       | NA        | NA                                  | 1:1 w drift |
